# Supplementary material for: Unveiling the [3+2] cycloaddition between difluoromethyl diazomethane and 3-ylideneoxindole from the perspective of molecular electron density theory
Source: Royal Society of Chemistry journal article supplement (doi:10.1039/d2nj02685f), 2022-01-01
Supplement: d2nj02685f1.pdf [file d2nj02685f1.pdf]

## Supplementary Material

### Unveiling the [3+2] Cycloaddition between Difluoromethyl Diazomethane and 3-Ylideneoxindole from the Perspective of the Molecular Electron Density Theory.

Abel Idrice Adjieufack,<sup>abc\*</sup> Vincent Liégeois,<sup>a\*</sup> Ibrahim Ndassa Mbouombouo,<sup>c</sup> Luis Ramon Domingo,<sup>d\*</sup> and Benoît Champagne <sup>a\*</sup>

<sup>a</sup> Laboratory of Theoretical Chemistry (LCT) and Namur Institute of Structured Matter (NISM), University of Namur, Rue de Bruxelles, 61, B-5000 Namur, Belgium.

<sup>b</sup> Physical and Theoretical Chemistry Laboratory, Faculty of Science, University of Yaoundé I, P.O. Box 812 Yaoundé, Cameroon.

<sup>c</sup> Computational Chemistry Laboratory, High Teacher Training College, University of Yaoundé I, P. O. Box 47 Yaoundé, Cameroon.

<sup>d</sup> Department of Organic Chemistry, University of Valencia, Dr. Moliner 50, 46100 Burjassot, Valencia, Spain

Email: adjieufack21@gmail.com  
vincent.liegeois@unamur.be  
luisrdomingo@gmail.com  
benoit.champagne@unamur.be

#### Content

- Tables
- Cartesians coordinates

**Table S1.** B3LYP/6-31G(d) electronic chemical potential ( $\mu$ ) chemical hardness ( $\eta$ ) electrophilicity ( $\omega$ ) and nucleophilicity ( $N$ ) in eV, in DCM, for DFDAM **1** and 3YOI **2**.

| Species        | $\mu$ | $\eta$ | $\omega$ | $N$  |
|----------------|-------|--------|----------|------|
| 3YOI <b>2</b>  | -4.27 | 3.43   | 2.66     | 2.81 |
| DFDAM <b>1</b> | -4.10 | 4.74   | 1.77     | 2.34 |
| DAM <b>5</b>   | -3.62 | 4.73   | 1.39     | 2.81 |

**Table S2.** Electronic energies (a.u) computed at the M06-2X/6-311+G(d,p) level for the reactants, TSs and cycloadducts (CAs) involved in this 32CA reaction for different media (gas, solvent)

|                | gas phase    | DCM          |
|----------------|--------------|--------------|
| <b>1</b>       | -386.5079212 | -386.5135304 |
| <b>2</b>       | -783.5531049 | -783.5623325 |
| <b>TS-on</b>   | -1170.052290 | -1170.064115 |
| <b>TS-ox</b>   | -1170.051802 | -1170.064282 |
| <b>TS-mn</b>   | -1170.048323 | -1170.059459 |
| <b>TS-mx</b>   | -1170.047483 | -1170.059236 |
| <b>3-trans</b> | -1170.120207 | -1170.133888 |
| <b>3-cis</b>   | -1170.117768 | -1170.131589 |
| <b>4-trans</b> | -1170.116532 | -1170.131705 |
| <b>4-cis</b>   | -1170.118606 | -1170.134277 |

**Table S3.** Thermodynamics parameters ( $H^\circ$  and  $G^\circ$ , in a.u and  $S^\circ$ , in cal/mol K) for the reactants, TSs and cycloadducts (CAs) involved in the 32CA reaction computed at 25°C and 1 atm with the M06-2X/6-311+G(d,p) method in DCM.

|                | $H^\circ$    | $S^\circ$ | $G^\circ$    |
|----------------|--------------|-----------|--------------|
| <b>1</b>       | -386.459867  | 78.9      | -386.497378  |
| <b>2</b>       | -783.305342  | 127.9     | -783.366127  |
| <b>TS-on</b>   | -1169.752169 | 160.2     | -1169.828291 |
| <b>TS-ox</b>   | -1169.752324 | 157.0     | -1169.826929 |
| <b>TS-mn</b>   | -1169.747675 | 156.0     | -1169.821813 |
| <b>TS-mx</b>   | -1169.747442 | 156.1     | -1169.821626 |
| <b>3-trans</b> | -1169.818200 | 152.3     | -1169.890547 |
| <b>3-cis</b>   | -1169.815814 | 150.8     | -1169.887462 |
| <b>4-trans</b> | -1169.816127 | 151.8     | -1169.888230 |
| <b>4-cis</b>   | -1169.818870 | 151.5     | -1169.890833 |

**Table S4.** GDET values evaluated at M06-2X/6-311+G(d,p) as a function of media (Gas and DCM)

|              | Gas  | DCM  |
|--------------|------|------|
| <b>TS-on</b> | 0.24 | 0.30 |
| <b>TS-ox</b> | 0.24 | 0.29 |
| <b>TS-mn</b> | 0.22 | 0.25 |
| <b>TS-mx</b> | 0.24 | 0.20 |

**Table S5.** Basin Populations (in e) and IRC coordinates (RX, amu<sup>1/2</sup> Bohr) along the TS-on reaction pathway

| <b>Basins</b>      | <b>SSD-I</b> |       | <b>SSD-II</b> |       | <b>SSD-III</b> |       | <b>SSD-IV</b> |       | <b>SSD-V</b> |       | <b>SSD-VI</b> |       | <b>SSD-VII</b> |       | <b>SSD-VIII</b> |        |
|--------------------|--------------|-------|---------------|-------|----------------|-------|---------------|-------|--------------|-------|---------------|-------|----------------|-------|-----------------|--------|
| <b>V(N1)</b>       | 3.75         | 3.69  | 3.67          | 3.55  | 3.55           | 3.53  | 3.53          | 3.53  | 3.51         | 3.50  | 3.52          | 3.61  | 2.93           | 2.85  | 2.83            | 2.69   |
| <b>V'(N1)</b>      | -            | -     | -             | -     | -              | -     | -             | -     | -            | -     | -             | -     | 0.69           | 0.80  | -               | -      |
| <b>V(N1,N2)</b>    | 3.82         | 3.83  | 3.82          | 3.52  | 3.42           | 3.33  | 3.27          | 3.27  | 3.17         | 3.11  | 3.05          | 2.81  | 2.81           | 2.74  | 2.70            | 2.55   |
| <b>V(N2,C3)</b>    | 2.94         | 3.02  | 3.03          | 3.44  | 2.25           | 2.11  | 2.01          | 2.01  | 1.93         | 1.89  | 1.85          | 1.73  | 1.74           | 1.75  | 1.76            | 1.82   |
| <b>V(C3,H4)</b>    | 2.14         | 2.19  | 2.52          | 2.20  | 2.17           | 2.15  | 2.13          | 2.13  | 2.12         | 2.11  | 2.11          | 2.06  | 2.06           | 2.07  | 2.06            | 2.06   |
| <b>V(N2)</b>       | -            | -     | -             | -     | 1.29           | 1.54  | 1.74          | 1.74  | 1.91         | 2.05  | 2.14          | 2.55  | 2.58           | 2.63  | 2.64            | 2.71   |
| <b>V(C3)</b>       | 0.74         | 0.34  | -             | -     | -              | -     | -             | -     | -            | -     | -             | -     | -              | -     | -               | -      |
| <b>V'(C3)</b>      | 0.30         | 0.57  | 0.63          | 0.87  | 0.90           | 0.94  | 0.97          | 0.97  | -            | -     | -             | -     | -              | -     | -               | -      |
| <b>V(C4,C5)</b>    | 3.33         | 3.32  | 3.32          | 3.23  | 3.22           | 3.21  | 2.97          | 2.97  | 2.87         | 2.79  | 2.55          | 2.12  | 2.09           | 2.07  | 2.06            | 1.92   |
| <b>V(C4)</b>       | -            | -     | -             | -     | -              | -     | 0.21          | 0.21  | -            | -     | -             | -     | -              | -     | -               | -      |
| <b>V(C5)</b>       | -            | -     | -             | -     | -              | -     | -             | -     | -            | -     | 0.19          | 0.43  | 0.47           | 0.48  | -               | -      |
| <b>V(N1,C5)</b>    | -            | -     | -             | -     | -              | -     | -             | -     | -            | -     | -             | -     | -              | -     | 1.39            | 1.77   |
| <b>V(C3,C4)</b>    | -            | -     | -             | -     | -              | -     | -             | -     | 1.30         | 1.38  | 1.45          | 1.82  | 1.84           | 1.85  | 1.86            | 1.92   |
| <b>RX</b>          | 25.02        | 3.52  | 3.32          | 0.64  | 0.32           | 0.00  | -0.32         | -0.32 | -0.64        | -0.96 | -1.28         | -3.53 | -3.85          | -4.17 | -4.49           | -32.06 |
| <b>E(kcal/mol)</b> | 28.14        | 35.21 | 35.87         | 43.20 | 43.80          | 43.04 | 43.76         | 43.76 | 42.87        | 41.34 | 39.24         | 20.65 | 18.42          | 16.21 | 14.05           | 0.00   |

**Table S6.** Basin Populations (in e) and IRC coordinates (RX, amu<sup>1/2</sup> Bohr) along the TS-mn reaction pathway

| <b>Basins</b>      | <b>SSD-I</b> |       | <b>SSD-II</b> |       | <b>SSD-III</b> |       | <b>SSD-IV</b> |       | <b>SSD-V</b> |       | <b>SSD-VI</b> |       | <b>SSD-VII</b> |        |
|--------------------|--------------|-------|---------------|-------|----------------|-------|---------------|-------|--------------|-------|---------------|-------|----------------|--------|
| <b>V(N1)</b>       | 3.70         | 3.74  | 3.73          | 3.58  | 3.55           | 3.53  | 3.52          | 3.55  | 3.52         | 3.59  | 2.93          | 2.87  | 2.82           | 2.75   |
| <b>V'(N1)</b>      | -            | -     | -             | -     | -              | -     | -             | -     | -            | -     | 0.68          | 0.82  | -              | -      |
| <b>V(N1,N2)</b>    | 3.82         | 3.79  | 3.81          | 3.39  | 3.30           | 3.19  | 3.12          | 3.03  | 2.98         | 2.84  | 2.79          | 2.69  | 2.68           | 2.57   |
| <b>V(N2,C3)</b>    | 3.06         | 3.01  | 3.04          | 3.54  | 2.18           | 1.97  | 1.92          | 1.90  | 1.88         | 1.83  | 1.89          | 1.87  | 1.86           | 1.81   |
| <b>V(C3,H4)</b>    | 2.15         | 2.18  | 2.24          | 2.18  | 2.18           | 2.14  | 2.12          | 2.10  | 2.11         | 2.09  | 2.09          | 2.09  | 2.07           | 2.05   |
| <b>V(N2)</b>       | -            | -     | -             | -     | 1.47           | 1.87  | 2.02          | 2.09  | 2.21         | 2.42  | 2.48          | 2.58  | 2.60           | 2.71   |
| <b>V(C3)</b>       | 0.73         | 0.39  | -             | -     | -              | -     | -             | -     | -            | -     | -             | -     | -              | -      |
| <b>V'(C3)</b>      | 0.34         | 0.59  | 0.60          | 0.91  | 0.94           | 0.96  | 0.97          | 0.99  | -            | -     | -             | -     | -              | -      |
| <b>V(C4,C5)</b>    | 3.36         | 3.32  | 3.32          | 3.21  | 3.19           | 3.17  | 2.95          | 2.87  | 2.57         | 2.30  | 2.24          | 2.15  | 2.10           | 1.89   |
| <b>V(C4)</b>       | -            | -     | -             | -     | -              | -     | -             | -     | 0.26         | 0.40  | 0.43          | 0.51  |                |        |
| <b>V(C5)</b>       | -            | -     | -             | -     | -              | -     | 0.23          | 0.29  | -            | -     | -             | -     | -              | -      |
| <b>V(C3,C5)</b>    | -            | -     | -             | -     | -              | -     | -             | -     | 1.39         | 1.56  | 1.61          | 1.70  | 1.74           | 1.89   |
| <b>V(N1,C4)</b>    | -            | -     | -             | -     | -              | -     | -             | -     | -            | -     | -             | -     | 1.41           | 1.75   |
| <b>RX</b>          | 30.60        | 5.47  | 5.15          | 0.97  | 0.64           | 0.00  | -0.32         | -0.64 | -0.97        | -1.93 | -2.25         | -2.90 | -3.22          | -21.56 |
| <b>E(kcal/mol)</b> | 21.92        | 27.27 | 27.71         | 40.54 | 41.55          | 42.48 | 42.20         | 41.27 | 39.74        | 31.73 | 28.27         | 20.94 | 17.33          | 0.00   |

## Cartesians coordinates (Gas phase) in Ångström

### 1 (DFDAM)

|   |             |             |             |
|---|-------------|-------------|-------------|
| C | -0.39309300 | -0.55383700 | 0.76735600  |
| N | -1.40902600 | -0.13076000 | 0.07032500  |
| N | -2.27399800 | 0.26125300  | -0.52874700 |
| C | 0.95875100  | -0.11005000 | 0.36270600  |
| F | 1.38394500  | -0.70852200 | -0.79427400 |
| H | -0.58724100 | -1.27030800 | 1.54624800  |
| F | 0.98070700  | 1.22750300  | 0.09923500  |
| H | 1.69259500  | -0.33065000 | 1.13768700  |

### 2 (3YOI)

|   |             |             |             |
|---|-------------|-------------|-------------|
| C | -2.00557100 | 2.81880300  | -0.00002000 |
| C | -3.29440700 | 2.29824900  | 0.00011400  |
| C | -3.51712000 | 0.91902700  | 0.00019500  |
| C | -2.40802100 | 0.09402900  | 0.00015100  |
| C | -1.08979400 | 0.59953100  | 0.00000200  |
| C | -0.89228000 | 1.97553800  | -0.00008500 |
| C | -0.19988200 | -0.56477300 | -0.00011100 |
| C | -1.11148300 | -1.78444000 | -0.00005000 |
| C | 1.11850900  | -0.79607300 | -0.00022400 |
| C | 2.18907100  | 0.22184600  | -0.00022900 |
| C | 4.52467200  | 0.51295700  | -0.00010900 |
| C | 5.76567800  | -0.34973700 | 0.00063200  |
| N | -2.40015100 | -1.30254100 | 0.00021600  |
| O | 2.04318900  | 1.41876100  | -0.00021200 |
| O | 3.39117200  | -0.36936600 | -0.00026600 |
| O | -0.78492600 | -2.94603800 | -0.00020300 |
| C | -3.57701000 | -2.13931900 | 0.00008700  |
| H | -1.85973600 | 3.89154700  | -0.00009500 |
| H | -4.14475200 | 2.96999200  | 0.00014500  |
| H | -4.52084200 | 0.51244300  | 0.00027400  |
| H | 0.11017100  | 2.37653300  | -0.00021000 |
| H | 4.46670500  | 1.15409900  | 0.88205600  |
| H | 4.46732400  | 1.15347900  | -0.88276800 |
| H | 5.79213600  | -0.98592700 | -0.88490300 |
| H | 6.65488700  | 0.28292700  | 0.00083300  |
| H | 5.79138200  | -0.98538900 | 0.88658200  |
| H | -4.18119900 | -1.95174300 | 0.89100800  |
| H | -4.18059100 | -1.95242500 | -0.89139700 |
| H | -3.24253400 | -3.17539200 | 0.00059500  |
| H | 1.43845400  | -1.83304000 | -0.00030000 |

### 5 (DAM)

|   |             |            |             |
|---|-------------|------------|-------------|
| C | -1.14145100 | 0.00000000 | -0.00011800 |
| N | 0.15197100  | 0.00000000 | 0.00000000  |
| N | 1.29795600  | 0.00000000 | 0.00000000  |

|   |             |             |            |
|---|-------------|-------------|------------|
| H | -1.65044200 | -0.95274500 | 0.00025100 |
| H | -1.65034300 | 0.95285800  | 0.00025100 |

**TS-on**

|   |             |             |             |
|---|-------------|-------------|-------------|
| C | 3.09510300  | 2.46512000  | -1.16853900 |
| C | 4.23284800  | 1.86630800  | -0.63833600 |
| C | 4.14009100  | 0.69750600  | 0.12010400  |
| C | 2.88000600  | 0.16545400  | 0.32669500  |
| C | 1.71163500  | 0.76038400  | -0.19830700 |
| C | 1.82731800  | 1.91740300  | -0.95828700 |
| C | 0.59735900  | -0.08763100 | 0.23548900  |
| C | 1.19364700  | -1.20322900 | 1.02044600  |
| C | -0.78259700 | 0.04999600  | 0.30991900  |
| C | -1.46936900 | 1.29207200  | -0.14063500 |
| N | -0.43479200 | -1.64478700 | -1.65368700 |
| N | 2.55231800  | -0.99117500 | 1.03817300  |
| O | -1.24426000 | 1.87245600  | -1.17342800 |
| O | -2.40331200 | 1.66941600  | 0.73356300  |
| O | 0.60323300  | -2.14885800 | 1.51799400  |
| C | 3.50315700  | -1.87998500 | 1.66308800  |
| H | 3.19116500  | 3.36689000  | -1.76054700 |
| H | 5.20633500  | 2.30672800  | -0.81721700 |
| H | 5.02344600  | 0.22434800  | 0.53173900  |
| H | 0.95001400  | 2.37739400  | -1.39117700 |
| H | 4.19877200  | -2.28018700 | 0.92131500  |
| H | 4.06630400  | -1.35539600 | 2.43859500  |
| H | 2.94151100  | -2.69719700 | 2.11286600  |
| H | -1.25956300 | -0.46193600 | 1.13991000  |
| C | -1.60828600 | -1.27248600 | -1.11158100 |
| H | -2.24855500 | -0.71038700 | -1.78608500 |
| C | -2.27367500 | -2.35274800 | -0.29373400 |
| H | -1.58431800 | -2.83124600 | 0.40527800  |
| F | -3.28053300 | -1.75872400 | 0.39300600  |
| F | -2.83821100 | -3.29860500 | -1.08958900 |
| N | 0.69491400  | -1.58741500 | -1.60809200 |
| C | -4.14567100 | 3.08939200  | 1.50245400  |
| H | -4.73650300 | 3.98024800  | 1.28303500  |
| H | -4.82124300 | 2.23864700  | 1.59894600  |
| H | -3.63400200 | 3.23756800  | 2.45410400  |
| C | -3.14777100 | 2.85324900  | 0.39269800  |
| H | -3.63262000 | 2.69197700  | -0.57234500 |
| H | -2.44718200 | 3.68321600  | 0.28218400  |

**TS-ox**

|   |            |             |            |
|---|------------|-------------|------------|
| C | 2.56333300 | -2.10001600 | 2.06606300 |
| C | 3.84671500 | -1.83603700 | 1.60119600 |
| C | 4.05492700 | -0.96973500 | 0.52612200 |

|   |             |             |             |
|---|-------------|-------------|-------------|
| C | 2.94163800  | -0.39290200 | -0.05885200 |
| C | 1.62856600  | -0.65273600 | 0.39247800  |
| C | 1.44564600  | -1.50861000 | 1.47152100  |
| C | 0.74032400  | 0.14305200  | -0.46426300 |
| C | 1.62120900  | 0.85928600  | -1.43676800 |
| C | -0.62221600 | 0.14095200  | -0.74564900 |
| C | -1.53692600 | -0.87969600 | -0.16693800 |
| N | -0.26569900 | 2.28240800  | 0.72617100  |
| N | 2.91564400  | 0.50082900  | -1.12923100 |
| O | -1.54054700 | -1.23058100 | 0.98927700  |
| O | -2.38883900 | -1.33811500 | -1.08054500 |
| O | 1.27869200  | 1.62870200  | -2.31389300 |
| C | 4.07878500  | 1.00381400  | -1.82059300 |
| H | 2.42437300  | -2.77028900 | 2.90526000  |
| H | 4.69959100  | -2.30333800 | 2.07869200  |
| H | 5.05291100  | -0.75644400 | 0.16274100  |
| H | 0.45271100  | -1.70998500 | 1.84707400  |
| H | 4.73325300  | 1.54112400  | -1.12977800 |
| H | 4.63642200  | 0.18457700  | -2.28101800 |
| H | 3.73008900  | 1.68525000  | -2.59497500 |
| H | -0.88507900 | 0.48465900  | -1.74053000 |
| C | -1.43220700 | 1.87813300  | 0.18034600  |
| H | -1.75127900 | 2.51576400  | -0.64138400 |
| C | -2.51334200 | 1.55717600  | 1.18200800  |
| H | -2.17839300 | 0.91041900  | 1.99268400  |
| F | -3.03988300 | 2.69396700  | 1.71008000  |
| F | -3.51325900 | 0.93973900  | 0.50159100  |
| N | 0.84507500  | 2.07436100  | 0.82109500  |
| C | -4.25470800 | -2.62959400 | -1.78409200 |
| H | -5.02841400 | -3.33055000 | -1.46649200 |
| H | -4.73760400 | -1.74245800 | -2.19554900 |
| H | -3.66098700 | -3.09999400 | -2.56884300 |
| C | -3.38504700 | -2.26224100 | -0.60441700 |
| H | -3.95039400 | -1.77080000 | 0.19005900  |
| H | -2.87868400 | -3.12959200 | -0.17689700 |

### TS-mn

|   |             |             |             |
|---|-------------|-------------|-------------|
| C | 0.97113600  | 3.09222400  | -1.67537100 |
| C | 2.10187800  | 3.40885100  | -0.93247400 |
| C | 2.48857900  | 2.62244400  | 0.15431300  |
| C | 1.70322600  | 1.52604600  | 0.46273900  |
| C | 0.55148000  | 1.19152000  | -0.27310300 |
| C | 0.18856100  | 1.97818400  | -1.35602400 |
| C | 0.01189000  | -0.05498500 | 0.33509200  |
| C | 0.97490200  | -0.39524500 | 1.45274700  |
| C | -1.30164400 | -0.47161200 | 0.55548300  |
| C | -2.46613100 | 0.11994700  | -0.12292600 |
| N | -0.36571300 | -2.20905500 | -1.12327700 |
| N | 1.91174800  | 0.60269000  | 1.49220300  |

|   |             |             |             |
|---|-------------|-------------|-------------|
| O | -2.45602500 | 0.62473600  | -1.22174000 |
| O | -3.57855200 | -0.01798400 | 0.60909400  |
| O | 0.94159000  | -1.37858000 | 2.16493800  |
| C | 3.08726600  | 0.56233200  | 2.33102900  |
| C | 0.78212500  | -1.50575500 | -1.08759600 |
| N | -1.42607500 | -2.25213100 | -0.70429800 |
| H | 0.69075800  | 3.71270600  | -2.51742000 |
| H | 2.69658100  | 4.27441100  | -1.19872100 |
| H | 3.37255400  | 2.86028900  | 0.73322200  |
| H | -0.68838000 | 1.73240100  | -1.93773100 |
| H | 3.98443100  | 0.44333700  | 1.71760800  |
| H | 3.16647500  | 1.47758900  | 2.92100800  |
| H | 2.98685400  | -0.29225600 | 2.99781200  |
| H | -1.49856000 | -1.02909700 | 1.46336000  |
| C | 1.96892600  | -2.28045500 | -0.57027400 |
| H | 1.76038900  | -2.82641600 | 0.35016500  |
| F | 2.42455400  | -3.15145200 | -1.51041800 |
| F | 2.96641100  | -1.38787600 | -0.34477900 |
| H | 0.96694900  | -0.92857900 | -1.99129000 |
| C | -5.91325700 | 0.19958100  | 0.98216200  |
| H | -6.85769400 | 0.55074100  | 0.56290800  |
| H | -6.00016100 | -0.86790600 | 1.18856700  |
| H | -5.73519200 | 0.72231600  | 1.92278400  |
| C | -4.79021700 | 0.46332900  | 0.00549400  |
| H | -4.93771300 | -0.05716500 | -0.94310100 |
| H | -4.67413400 | 1.52724300  | -0.21089000 |

### TS-mx

|   |             |             |             |
|---|-------------|-------------|-------------|
| C | 1.58191800  | -1.92364500 | 2.37275400  |
| C | 2.78238000  | -2.26865500 | 1.76514800  |
| C | 3.03809900  | -1.92020900 | 0.43790500  |
| C | 2.05836500  | -1.21894200 | -0.24080700 |
| C | 0.83714800  | -0.85267500 | 0.35655600  |
| C | 0.60022300  | -1.21286100 | 1.67548100  |
| C | 0.07163000  | -0.10485000 | -0.67757800 |
| C | 0.94218200  | -0.13569200 | -1.91524900 |
| C | -1.30030900 | -0.01624000 | -0.92063900 |
| C | -2.30660000 | -0.26378100 | 0.12149600  |
| N | -0.57127800 | 2.43250900  | -0.51418200 |
| N | 2.10927900  | -0.77041600 | -1.56378200 |
| O | -2.13564400 | -0.07321900 | 1.30586100  |
| O | -3.47335600 | -0.66240800 | -0.39394800 |
| O | 0.68340400  | 0.33932800  | -2.99935200 |
| C | 3.21020600  | -0.99605600 | -2.47185800 |
| C | 0.65119300  | 1.94115000  | -0.23523800 |
| N | -1.63047400 | 2.12918600  | -0.81130900 |
| H | 1.40068700  | -2.20452900 | 3.40272200  |
| H | 3.53223700  | -2.81533000 | 2.32415400  |
| H | 3.97090700  | -2.18821900 | -0.04297000 |



|   |             |             |             |
|---|-------------|-------------|-------------|
| H | -0.32912700 | -0.94415400 | 2.15741700  |
| H | 4.12393400  | -0.53816000 | -2.08587600 |
| H | 3.37618300  | -2.06674400 | -2.61367900 |
| H | 2.94811900  | -0.54080600 | -3.42553600 |
| H | -1.63161300 | -0.03954400 | -1.95138100 |
| C | 1.04960900  | 2.04882100  | 1.21743900  |
| H | 0.37329500  | 1.51068300  | 1.88447800  |
| F | 2.29768000  | 1.54148600  | 1.32862100  |
| F | 1.10577500  | 3.34885500  | 1.61502600  |
| H | 1.41507700  | 2.23744600  | -0.95086100 |
| C | -5.76544600 | -1.26483100 | -0.24545800 |
| H | -6.60982300 | -1.41331500 | 0.42980700  |
| H | -6.03442100 | -0.50054500 | -0.97562600 |
| H | -5.57508200 | -2.19959300 | -0.77429000 |
| C | -4.54776400 | -0.84194800 | 0.54369300  |
| H | -4.70655700 | 0.09860200  | 1.07523100  |
| H | -4.24982700 | -1.59492100 | 1.27612500  |

### ***3-trans***

|   |             |             |             |
|---|-------------|-------------|-------------|
| C | -3.15765400 | 0.58983500  | 1.68327800  |
| C | -3.92372600 | -0.34585700 | 0.99717500  |
| C | -3.33078600 | -1.32171700 | 0.19036000  |
| C | -1.95058400 | -1.31241500 | 0.09309300  |
| C | -1.17016300 | -0.36299200 | 0.75868100  |
| C | -1.76274500 | 0.58227500  | 1.57193000  |
| C | 0.27382900  | -0.62696900 | 0.43246600  |
| C | 0.19103800  | -1.87082800 | -0.48208100 |
| C | 1.13493900  | 0.47272300  | -0.24115900 |
| C | 0.43722600  | 1.81330600  | -0.16151300 |
| N | 2.14343900  | -0.48636300 | 1.71956500  |
| N | -1.13070100 | -2.19184500 | -0.62878000 |
| O | 0.65554200  | 2.65655300  | 0.66553500  |
| O | -0.50838400 | 1.88765000  | -1.09550800 |
| O | 1.13745900  | -2.42076400 | -0.98957900 |
| C | -1.60782000 | -3.29509200 | -1.43335500 |
| H | -3.64209800 | 1.32381700  | 2.31480700  |
| H | -5.00261600 | -0.32827200 | 1.09494000  |
| H | -3.93042600 | -2.05857400 | -0.32967000 |
| H | -1.15963800 | 1.30419100  | 2.11217000  |
| H | -2.15761000 | -4.00641400 | -0.81320300 |
| H | -2.25770800 | -2.93009200 | -2.23183600 |
| H | -0.73890200 | -3.78700800 | -1.86704100 |
| H | 1.30252500  | 0.22619800  | -1.28995900 |
| C | 2.42423800  | 0.41454900  | 0.57742600  |
| H | 2.72192900  | 1.38849500  | 0.97333100  |
| C | 3.58826300  | -0.16550600 | -0.21024100 |
| H | 3.41015900  | -1.18717200 | -0.55238900 |
| F | 3.80452600  | 0.62611400  | -1.29892300 |
| F | 4.71263900  | -0.13370900 | 0.53969900  |

|   |             |             |             |
|---|-------------|-------------|-------------|
| N | 1.04594100  | -1.02504400 | 1.65333700  |
| C | -2.71498600 | 2.51426500  | -1.69382000 |
| H | -3.47290200 | 3.29782600  | -1.64097200 |
| H | -2.51554800 | 2.29323300  | -2.74325700 |
| H | -3.10561800 | 1.61555100  | -1.21056400 |
| C | -1.45578400 | 2.96803000  | -0.99126200 |
| H | -1.01459400 | 3.85645900  | -1.44755200 |
| H | -1.63082900 | 3.17374600  | 0.06590600  |

### **3-cis**

|   |             |             |             |
|---|-------------|-------------|-------------|
| C | -2.82267900 | 1.42840500  | 1.70967200  |
| C | -3.90567500 | 0.85408500  | 1.05458400  |
| C | -3.74382500 | -0.24867400 | 0.21139200  |
| C | -2.46010500 | -0.73590100 | 0.04304800  |
| C | -1.35674100 | -0.15074600 | 0.67249600  |
| C | -1.53203400 | 0.91987100  | 1.52765800  |
| C | -0.12753200 | -0.91895900 | 0.27763500  |
| C | -0.70108400 | -2.03483900 | -0.63029000 |
| C | 1.03416700  | -0.20666000 | -0.46122400 |
| C | 1.05094700  | 1.25872000  | -0.08248600 |
| N | 1.75102600  | -1.62621900 | 1.33379100  |
| N | -2.05336000 | -1.83900300 | -0.72013900 |
| O | 1.54811200  | 1.69691900  | 0.92304700  |
| O | 0.37699300  | 1.98710800  | -0.96518800 |
| O | -0.05118900 | -2.89011500 | -1.17733900 |
| C | -2.93824300 | -2.67890400 | -1.49667400 |
| H | -2.97978500 | 2.26759000  | 2.37552500  |
| H | -4.89917000 | 1.25803500  | 1.20829800  |
| H | -4.59251300 | -0.70684300 | -0.28125100 |
| H | -0.68724400 | 1.35086500  | 2.05294900  |
| H | -3.67992900 | -3.15015700 | -0.84787500 |
| H | -3.44766200 | -2.08963400 | -2.26243900 |
| H | -2.33088500 | -3.44727900 | -1.97187900 |
| H | 0.92849900  | -0.30113800 | -1.53978600 |
| C | 2.22570700  | -1.01152400 | 0.07118700  |
| H | 2.45082200  | -1.84121900 | -0.60578900 |
| C | 3.52457800  | -0.26165700 | 0.31340000  |
| H | 3.52662100  | 0.36140900  | 1.20439500  |
| F | 4.53960400  | -1.15581100 | 0.39830800  |
| F | 3.77011300  | 0.52586000  | -0.77445300 |
| N | 0.53332800  | -1.58652100 | 1.45074600  |
| C | -0.72757400 | 3.96564600  | -1.67717500 |
| H | -0.89633000 | 5.02277300  | -1.46578900 |
| H | -0.28856300 | 3.87641300  | -2.67156900 |
| H | -1.68967600 | 3.45109700  | -1.67002800 |
| C | 0.19026100  | 3.37696600  | -0.63195400 |
| H | 1.16874300  | 3.86046800  | -0.61226900 |
| H | -0.23968000 | 3.43310400  | 0.37024700  |

#### 4-trans

|   |             |             |             |
|---|-------------|-------------|-------------|
| C | 1.81045400  | 0.54635200  | 2.71356400  |
| C | 2.26499000  | 1.75185500  | 2.19244500  |
| C | 1.75200800  | 2.26865900  | 0.99810200  |
| C | 0.77721400  | 1.52926600  | 0.35192400  |
| C | 0.31354600  | 0.31316500  | 0.86311900  |
| C | 0.82140700  | -0.18612200 | 2.04581800  |
| C | -0.71532300 | -0.24015600 | -0.08687200 |
| C | -0.75940100 | 0.83164800  | -1.19108900 |
| C | -0.38804500 | -1.61549700 | -0.73798200 |
| C | 1.02626000  | -2.05581500 | -0.42235100 |
| N | -2.27208000 | -2.02456100 | 0.42980400  |
| N | 0.12591700  | 1.81925900  | -0.85149300 |
| O | 1.33877600  | -2.90948400 | 0.35468000  |
| O | 1.87710900  | -1.26593600 | -1.08338800 |
| O | -1.42943700 | 0.77891200  | -2.19591000 |
| C | 0.37790200  | 2.98623100  | -1.66682700 |
| C | -2.07095500 | -0.56231800 | 0.58385400  |
| N | -1.39231500 | -2.56563000 | -0.22792100 |
| H | 2.22313300  | 0.16944700  | 3.64067600  |
| H | 3.02943100  | 2.30819500  | 2.72146000  |
| H | 2.10608100  | 3.21085800  | 0.59769900  |
| H | 0.47662700  | -1.13605800 | 2.44169200  |
| H | 0.14379400  | 3.89609200  | -1.11003700 |
| H | 1.42415600  | 3.01020200  | -1.98139600 |
| H | -0.26409900 | 2.92102000  | -2.54340900 |
| H | -0.52219000 | -1.56477900 | -1.82294400 |
| C | -3.28110500 | 0.17302900  | 0.02587400  |
| H | -3.47923300 | -0.01107700 | -1.02923300 |
| F | -4.37181100 | -0.16208200 | 0.75196800  |
| F | -3.07316600 | 1.50894900  | 0.20249300  |
| H | -2.04975400 | -0.34574900 | 1.65546900  |
| C | 3.97826300  | -0.19850000 | -1.35824500 |
| H | 5.03067400  | -0.20089900 | -1.06970200 |
| H | 3.91442500  | -0.30344800 | -2.44216400 |
| H | 3.54086300  | 0.75878900  | -1.06784700 |
| C | 3.25461000  | -1.32984600 | -0.66573300 |
| H | 3.65557500  | -2.30957300 | -0.93178900 |
| H | 3.28211400  | -1.22794000 | 0.42199800  |

#### 4-cis

|   |             |             |             |
|---|-------------|-------------|-------------|
| C | -0.79322700 | 0.82222500  | -2.90049900 |
| C | -1.42638200 | 1.95597400  | -2.40575000 |
| C | -1.35122700 | 2.30107600  | -1.05255100 |
| C | -0.61316900 | 1.47413000  | -0.22374600 |
| C | 0.04161000  | 0.33742100  | -0.71107400 |
| C | -0.05325700 | -0.00413000 | -2.04612200 |

|   |             |             |             |
|---|-------------|-------------|-------------|
| C | 0.70023600  | -0.35501000 | 0.45555300  |
| C | 0.32310900  | 0.54072500  | 1.64376200  |
| C | 0.25680000  | -1.82035900 | 0.66625200  |
| C | -1.10413500 | -2.09106600 | 0.06009600  |
| N | 2.35582400  | -1.98582600 | -0.11801200 |
| N | -0.42265300 | 1.58428600  | 1.15570300  |
| O | -1.34070700 | -2.82709500 | -0.85094700 |
| O | -1.99752200 | -1.29892300 | 0.66340600  |
| O | 0.63530600  | 0.35176000  | 2.79358500  |
| C | -0.96151700 | 2.64028200  | 1.98258500  |
| C | 2.21340300  | -0.58482600 | 0.36159000  |
| N | 1.32723100  | -2.63430000 | 0.04616200  |
| H | -0.87632700 | 0.57165600  | -3.95024000 |
| H | -1.99524800 | 2.58626800  | -3.07874900 |
| H | -1.85394500 | 3.18142600  | -0.67072100 |
| H | 0.41951700  | -0.90517800 | -2.42457900 |
| H | -0.58079700 | 3.61034200  | 1.65577400  |
| H | -2.05342900 | 2.64312600  | 1.93533300  |
| H | -0.64426200 | 2.45090600  | 3.00654200  |
| H | 0.24241000  | -2.05721800 | 1.73709300  |
| C | 2.97316500  | 0.37135900  | -0.53151900 |
| H | 2.72539100  | 0.28884400  | -1.59051800 |
| F | 2.69985400  | 1.64226600  | -0.12226600 |
| F | 4.30249500  | 0.17319000  | -0.38163300 |
| H | 2.66519200  | -0.54242100 | 1.36102200  |
| C | -4.03810400 | -0.09389900 | 0.73723500  |
| H | -5.02417400 | 0.03175100  | 0.28710900  |
| H | -4.16460000 | -0.33795500 | 1.79287500  |
| H | -3.49638700 | 0.85048400  | 0.65442700  |
| C | -3.28146600 | -1.18813000 | 0.02075300  |
| H | -3.78752100 | -2.15355200 | 0.07697600  |
| H | -3.11140800 | -0.94727200 | -1.03194800 |
